# Supplementary material for: Collagen hydroxylation couples NAD+/NADH dynamics to tumor dormancy and reactivation
Source: Research Square preprint supplement (doi:10.21203/rs.3.rs-6986228/v1), 2025-07-10
Supplement: Supplementary file 1 [file 2859b9b7367849fea52f815d.xlsx]

## Sheet: Table 1
	Cell Line	Tissue of Origin	Specie	Category	Culture Medium
	D-HEp3	Head and Neck Carcinoma	Human	Dormant	DMEM supplemented with 4,5 g D-Glucose, 110mg/l sodium pyruvate, 10% Atlas Biologicals Fetal Bovine Serum (Cat# F-0500-A) and 1% Pennicillin/Streptomycin
	R-HEp3	Head and Neck Carcinoma	Human	Dormant reactivated	DMEM supplemented with 4,5 g D-Glucose, 110mg/l sodium pyruvate, 10% Atlas Biologicals Fetal Bovine Serum (Cat# F-0500-A) and 1% Pennicillin/Streptomycin
	T-HEp3	Head and Neck Carcinoma	Human	Proliferative	DMEM supplemented with 4,5 g D-Glucose, 110mg/l sodium pyruvate, 10% Atlas Biologicals Fetal Bovine Serum (Cat# F-0500-A) and 1% Pennicillin/Streptomycin
	D2.0R	Breast cancer	Mouse	Dormant	DMEM supplemented with 4,5 g D-Glucose Glutamax and 10% Gemini Foundation Serum (Cat# 900-108) and 1% Pennicillin/Streptomycin
	D2.A1	Breast cancer	Mouse	Proliferative	DMEM supplemented with 4,5 g D-Glucose Glutamax and 10% Gemini Foundation Serum (Cat# 900-108) and 1% Pennicillin/Streptomycin
	4T07	Breast cancer	Mouse	Dormant	DMEM supplemented with 4,5 g D-Glucose Glutamax and 10% Gemini Foundation Serum (Cat# 900-108) and 1% Pennicillin/Streptomycin
	4T1	Breast cancer	Mouse	Proliferative	RPMI Glutamax supplemented with 10% Gemini Foundation Serum (Cat# 900-108) and 1% Pennicillin/Streptomycin
	HCC1954-LCC	Breast cancer	Human	Latent	DMEM supplemented with 4,5 g D-Glucose Glutamax and 10% Gemini Foundation Serum (Cat# 900-108) and 1% Pennicillin/Streptomycin
	HCC1954	Breast cancer	Human	Proliferative	DMEM supplemented with 4,5 g D-Glucose Glutamax and 10% Gemini Foundation Serum (Cat# 900-108) and 1% Pennicillin/Streptomycin
	HEK293T	Embryonic kidney	Human	Immortalized	DMEM supplemented with 4,5 g D-Glucose Glutamax and 10% Gemini Foundation Serum (Cat# 900-108) and 1% Pennicillin/Streptomycin
