# Supplementary material for: Collagen hydroxylation couples NAD+/NADH dynamics to tumor dormancy and reactivation
Source: Research Square preprint supplement (doi:10.21203/rs.3.rs-6986228/v1), 2025-07-10
Supplement: Supplementary file 2 [file 9eb6f6b3349b3342cb2a43f4.xlsx]

## Sheet: Table 2
	Target	Species	Catalog Number	Sequence
	sh CTRL		RHS6848
	P4HA2	Mouse	RMM3981-97064766	CGATCTGATTTACGCAGAGAA
	P4HA2	Mouse	RMM3981-97064768	CGTCAGGTACTATGATGTGAT
	P4HA2	Human	RHS3979-9629178 (P4HA2 shRNA1)	GCGGTACTTTGAGCAGTTATT
	P4HA2	Human	RHS3979-9629180 (P4HA2 shRNA2)	GCCGAATTCTTCACCTCTATT
	P4HA2	Human	RHS3979-9629181 (P4HA2 shRNA3)	GCAGTCTCTGAAAGAGTACAT
	HPRT-S1 DS POS		IDT 51-01-08-02
	hs.Ri.P4HA2 13.1 (siP4HA2 #1)	Human	IDT 312699328	AAAAGUUCUGAUACCUUGUUUACATG
	hs.Ri.P4HA2 13.2 (siP4HA2 #2)	Human	IDT 312699331	CAACAGAAGUUGACUGACAUCCCUTT
	hs.Ri.P4HA2 13.3 (siP4HA2 #3)	Human	IDT 312699334	GGUACUACGAUGUCAUGUCUGAUGA
	hs.Ri.ALDH4A1 13.1 (siALDH4A1)	Human	IDT462204658	GAGUGGUCAGAGAUCUGUAAAGCAT
	hs.Ri.COL5A1 13.2 (siCOL5A1)	Human	IDT469869595	GCGUCCACAAGAAAAAUGUCACCTT
