# Supplementary material for: Collagen hydroxylation couples NAD+/NADH dynamics to tumor dormancy and reactivation
Source: Research Square preprint supplement (doi:10.21203/rs.3.rs-6986228/v1), 2025-07-10
Supplement: Supplementary file 3 [file fff5eae342be27b4442d8294.xlsx]

## Sheet: Table 3
Antibody Name	Seller	Reference
Actin	NOVUSBIO	NB600-501
ALDH4A1	invitrogen	PA5-96180
Collagen 4A1	Cell signaling	50273S
Collagen 4A2	invitrogen	PA5-27708
Collagen 5A1	invitrogen	pa5-83158
Collagen V	abcam	ab7046
Collagen 6A1 (b-4)	Santa Cruz	sc-377143
Collagen 12A1	abcam	ab121304
Her2	Calbiochem	OP15L
LAMP1	INVITROGEN	MAI-164
p27 Kip1 (D69C12) XP ®	Cell signaling	3686S
P4HA2	INVITROGEN	PA5-53530
phospho-Histone H3 (s10)	Cell signaling	9701s
PRODH	PROTEINTECH	22980-1-AP
Phospho-PERK (Thr982)	invitrogen	PA5-102853
PD1A3	ATLAS ANTIBODIES	AMAb90988
ANTOBODIES USED FOR MULTIPLEX IMAGING (Fig. 2i)
Antibody Name	Vendor	Reference
c-Myc	abcam	ab190560
S6	Cell signaling	5548
phospho-STAT3	Cell signaling	4324
53BP1	abcam	ab222232
phospho-ATR	abcam	ab289363
phospho-ERK	Cell signaling	45899
phospho-S6	Cell signaling	398
E2F1	Biolegend	606052
p65	Cell signaling	69994
CDT1	abcam	ab211857
phospho-H3	Cell signaling	9701BF
