# Supplementary figures and images for: Collagen hydroxylation couples NAD+/NADH dynamics to tumor dormancy and reactivation
Source: Research Square preprint supplement (doi:10.21203/rs.3.rs-6986228/v1), 2025-07-10

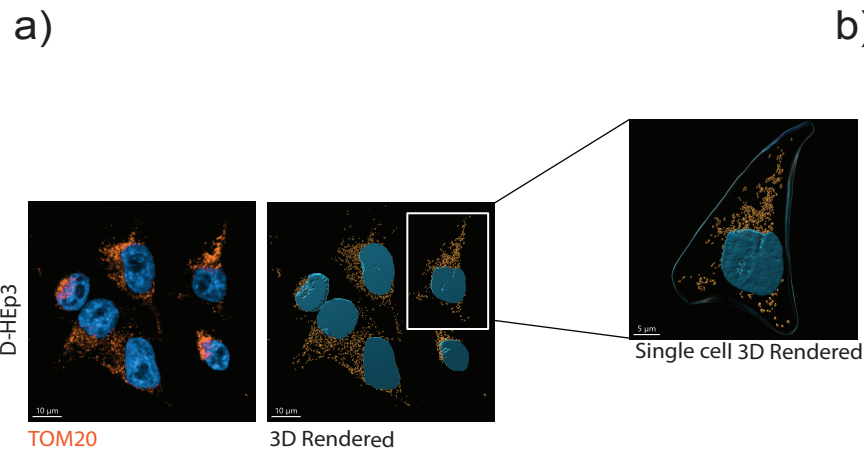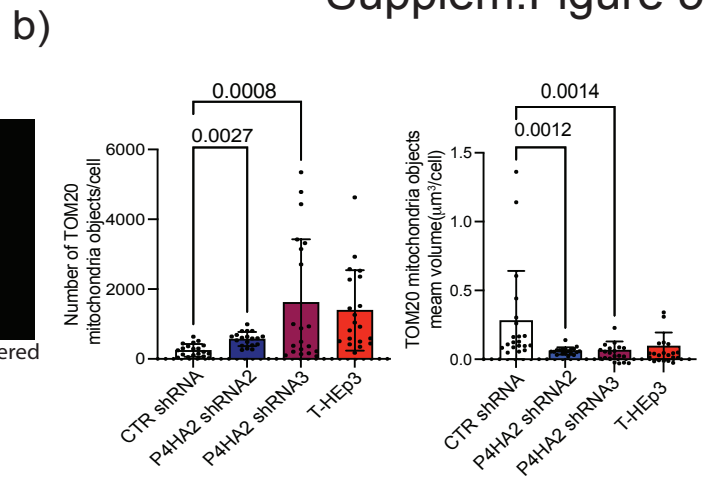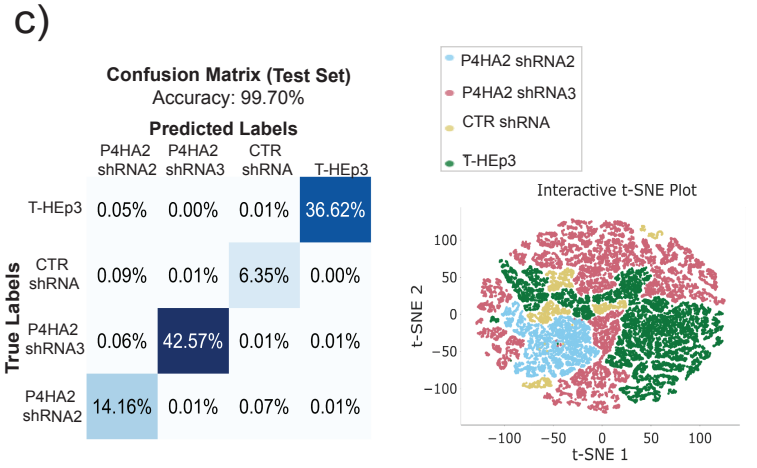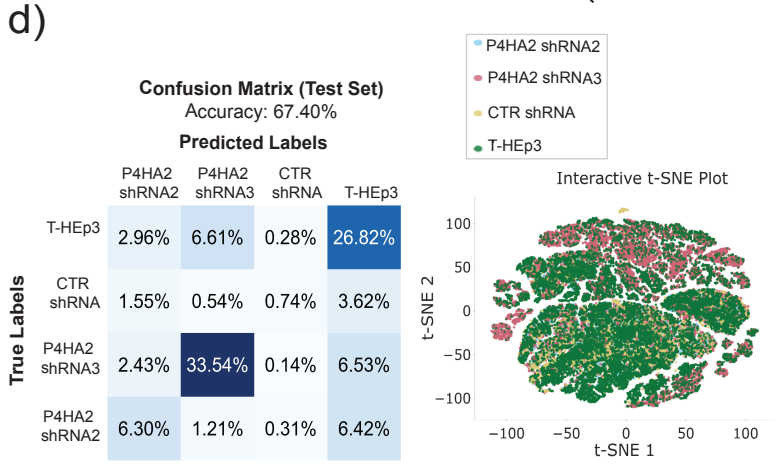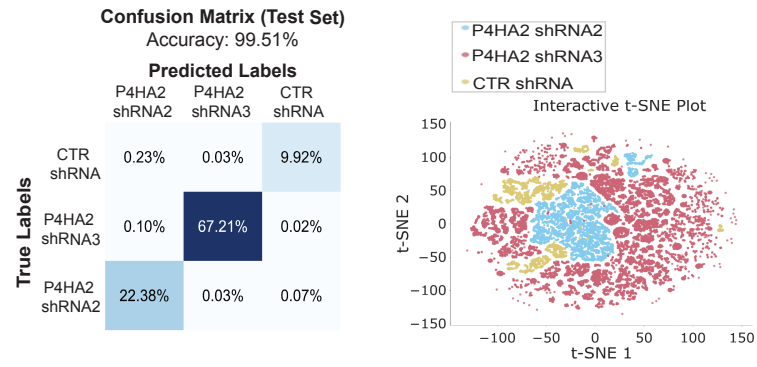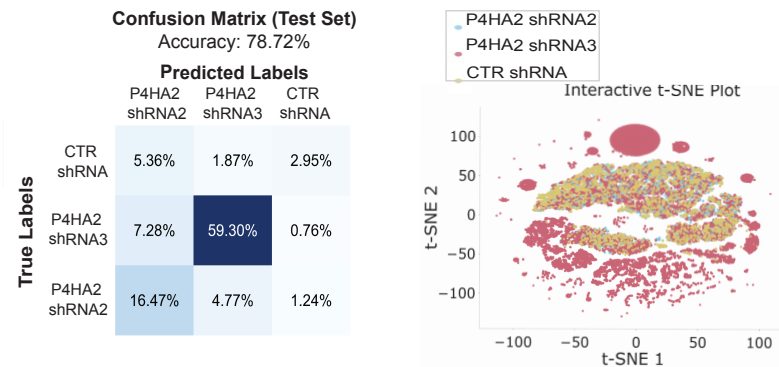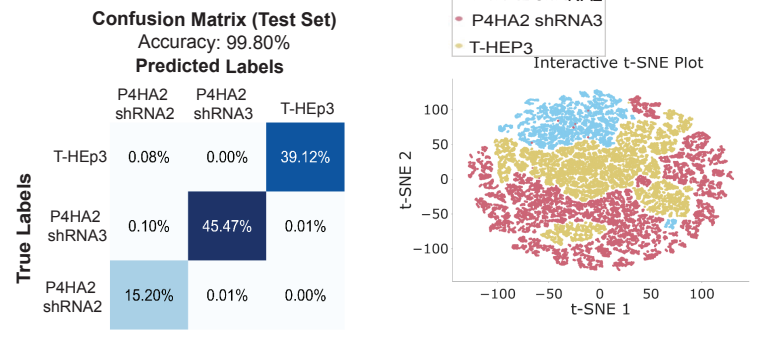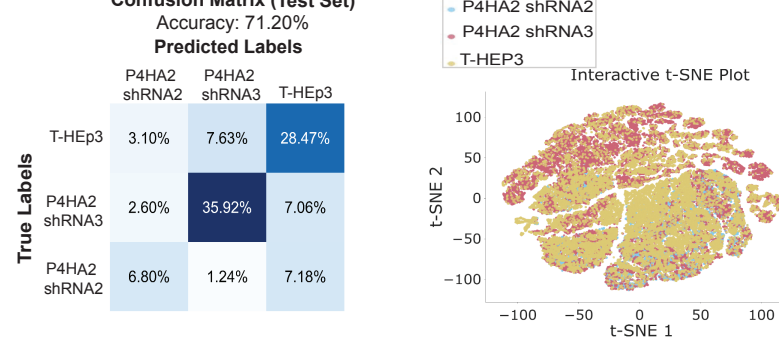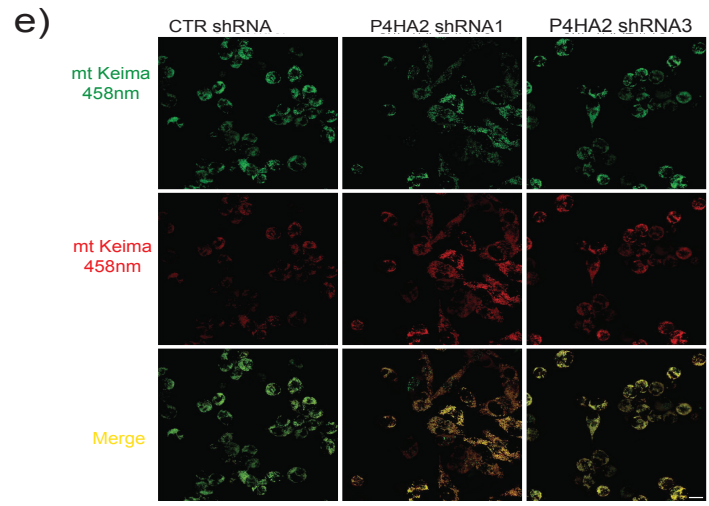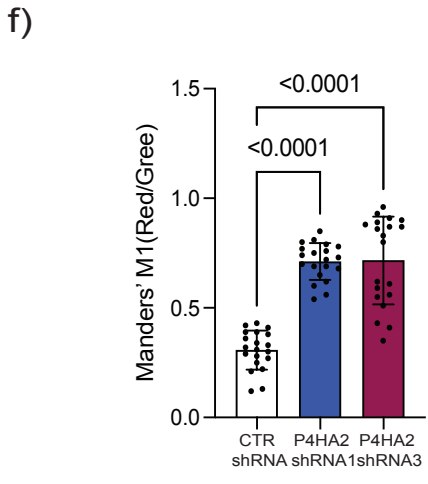

Supplement: Supplementary file 1 [file 1c77937de072b6f911af106a.pdf]

a)

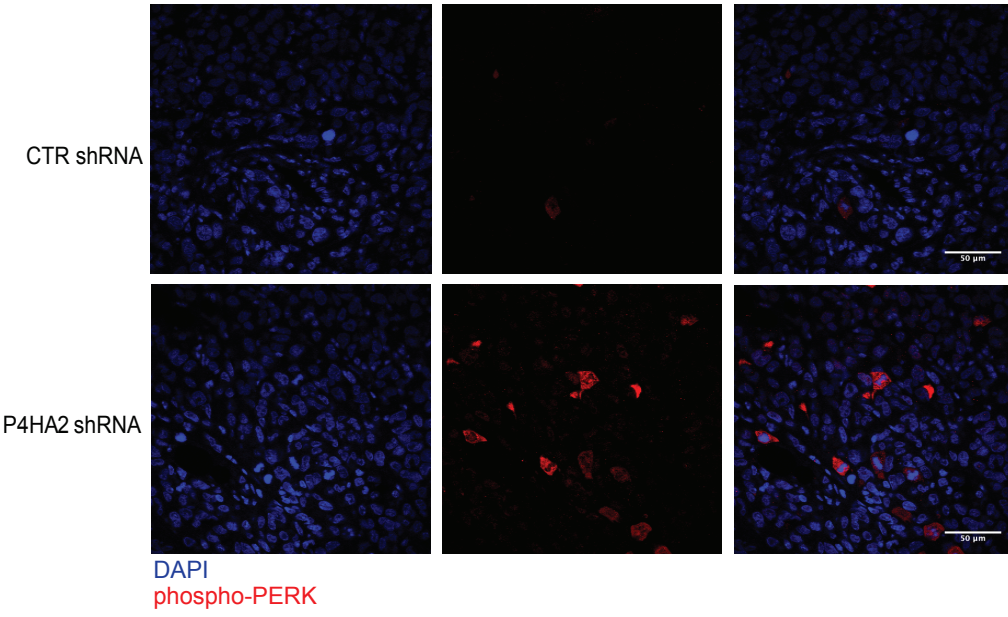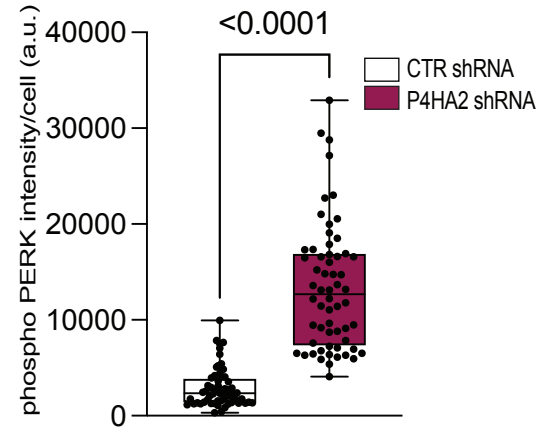

b)

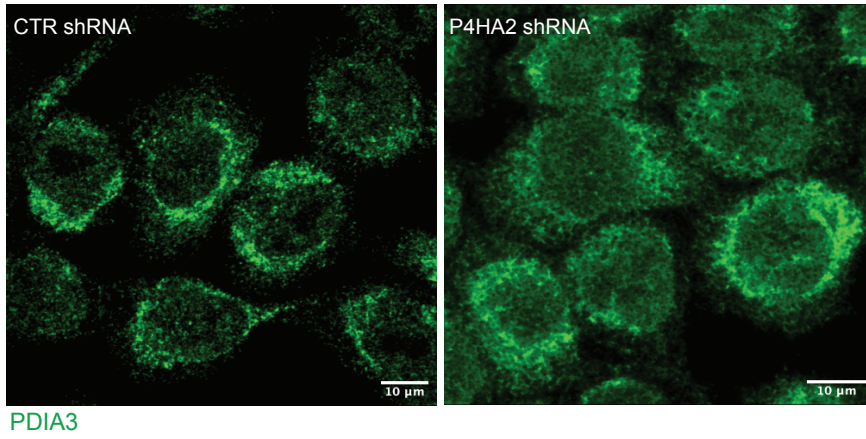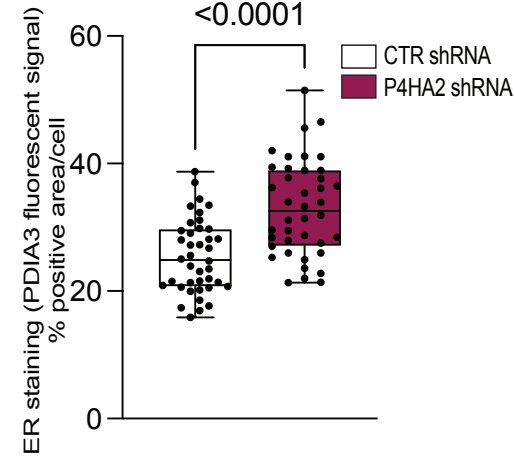

c)

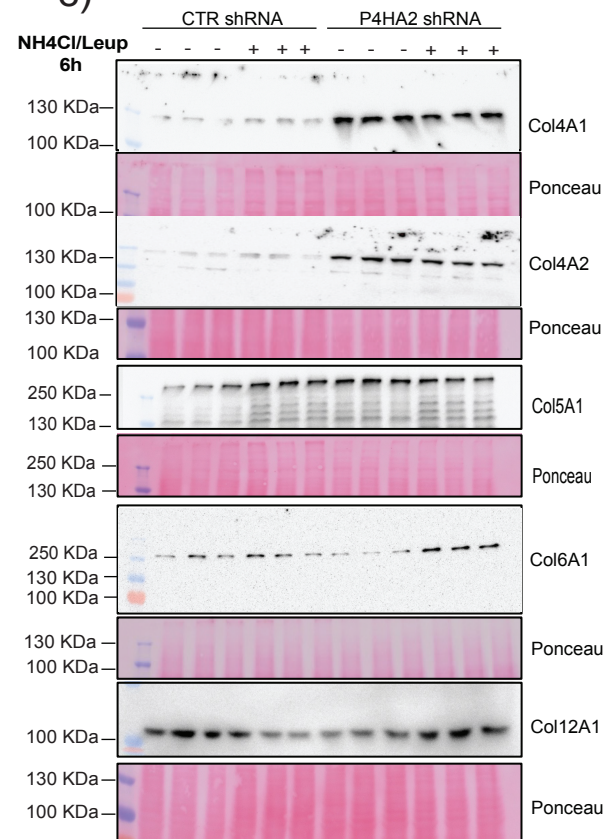

d)

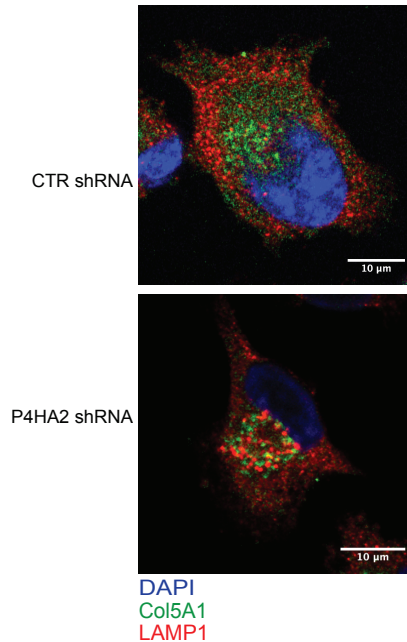

e)

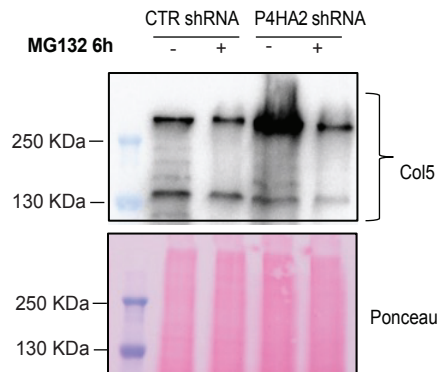

f)

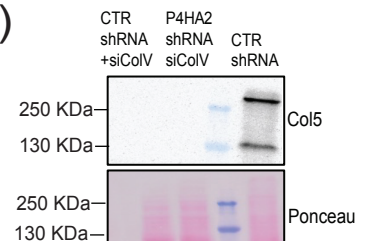

Supplement: Supplementary file 2 [file 3c36d1dc91ca7415c4a69e4f.pdf]

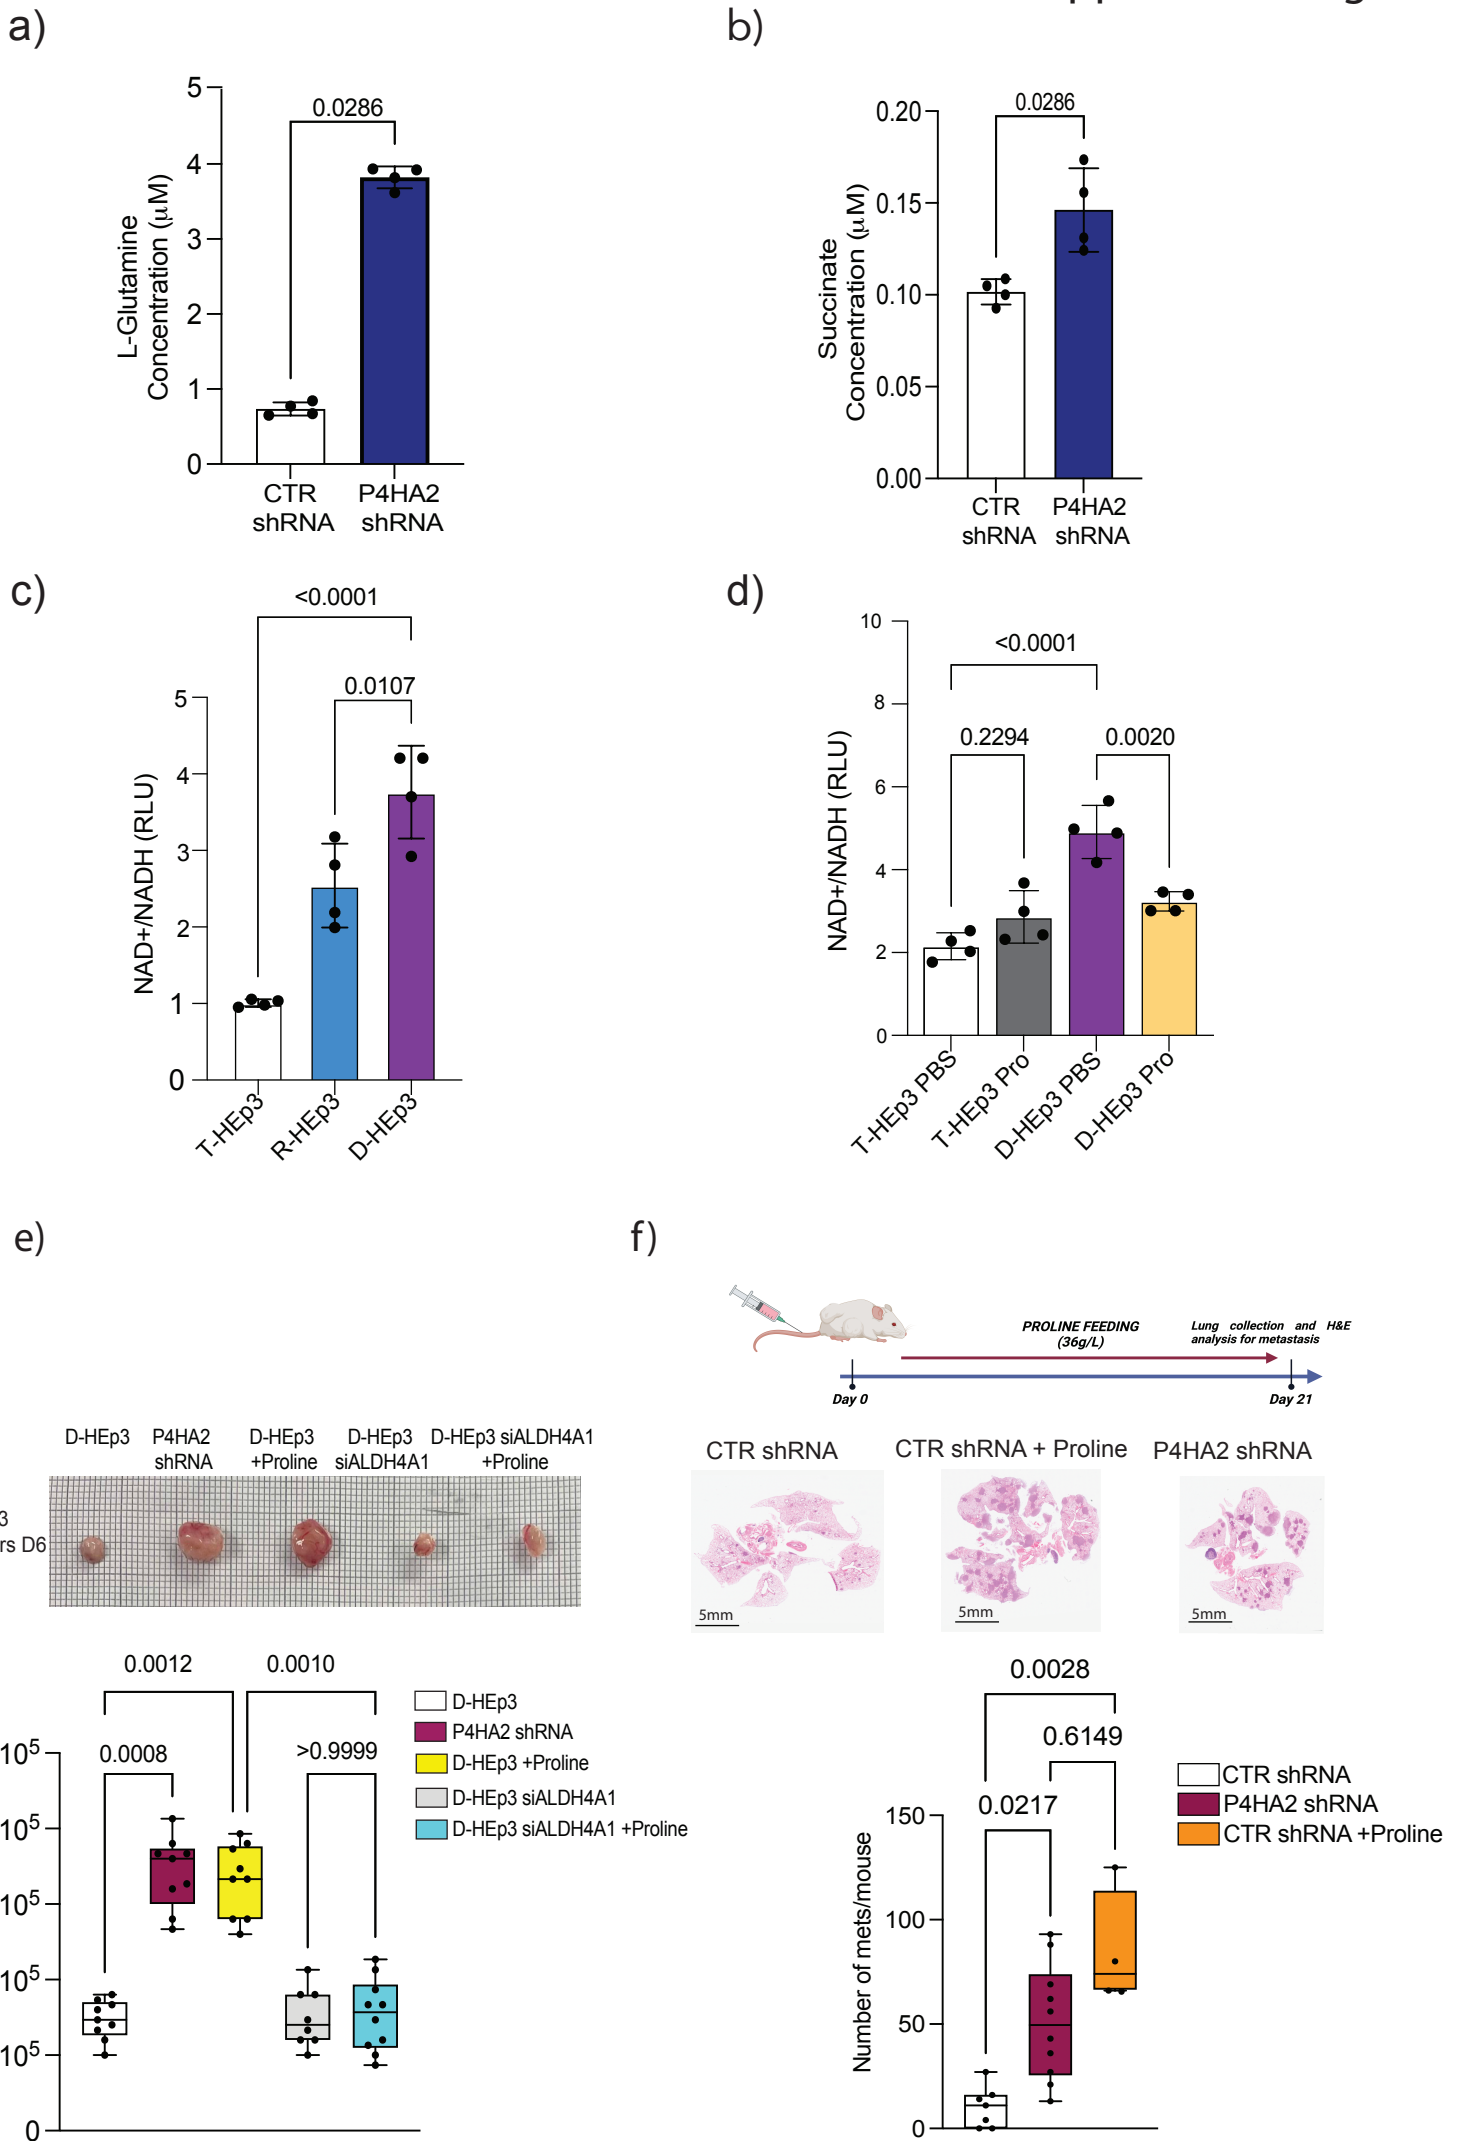

Supplement: Supplementary file 3 [file 6050899c0d7314c72537ff63.pdf]

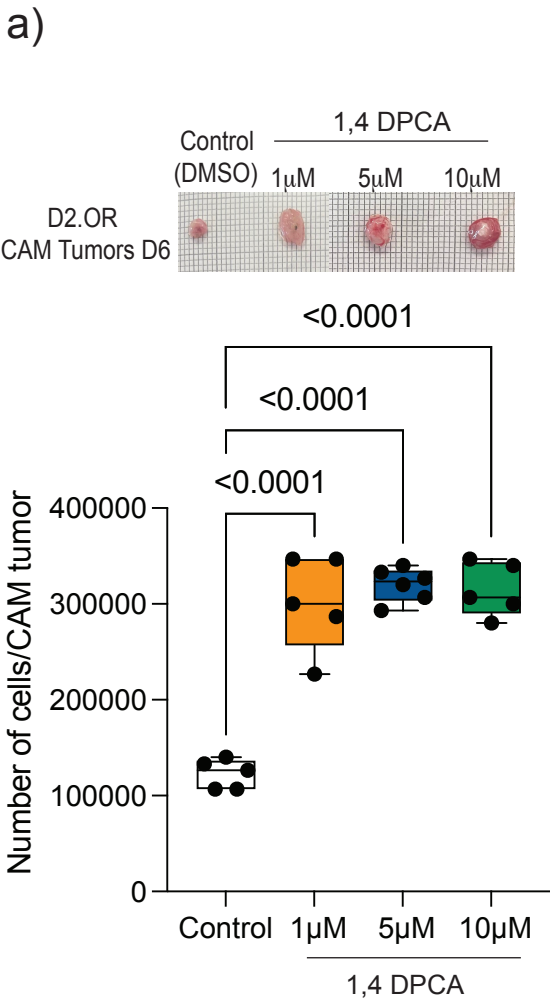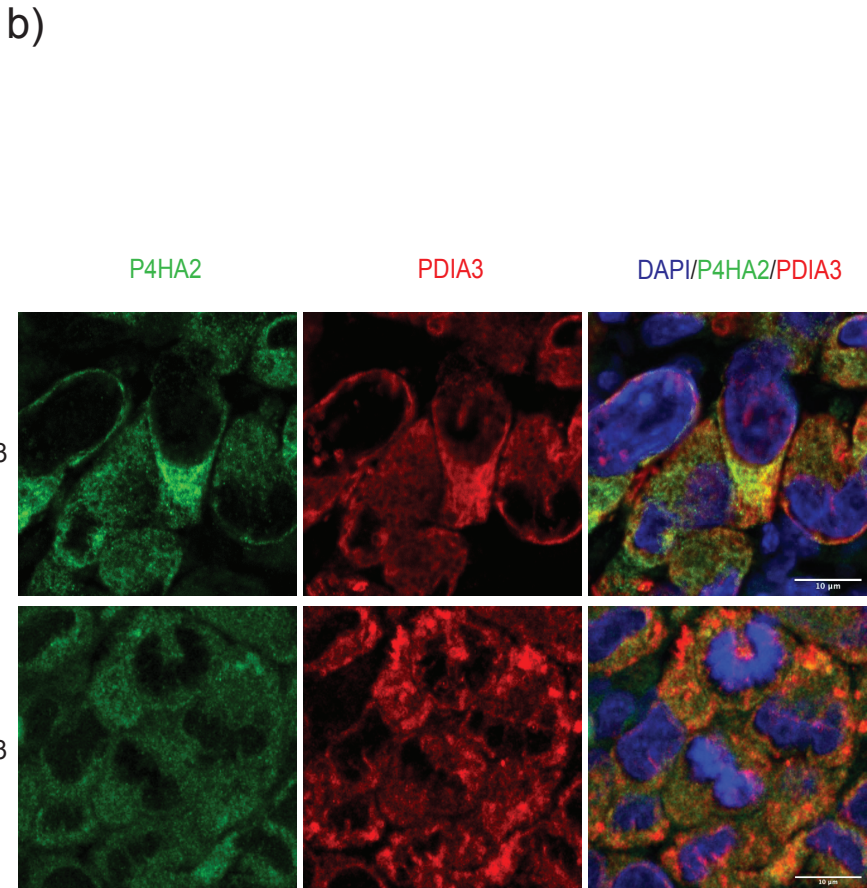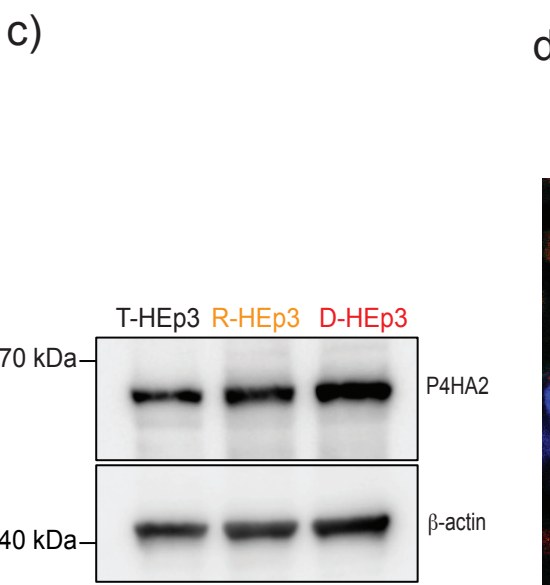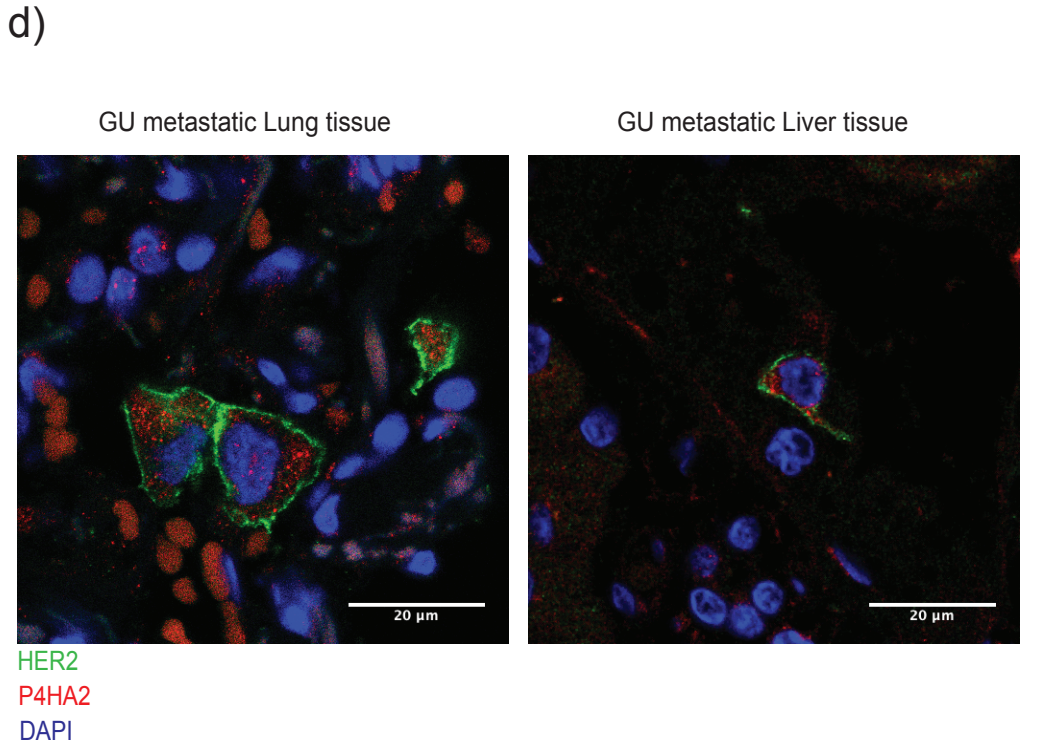

Supplement: Supplementary file 4 [file 7d3722a76c9550eb015551ed.pdf]

a)

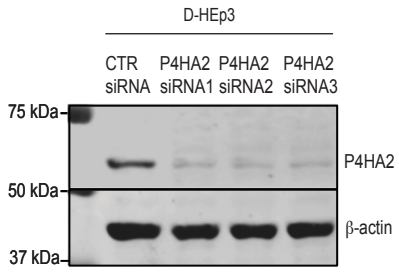

b)

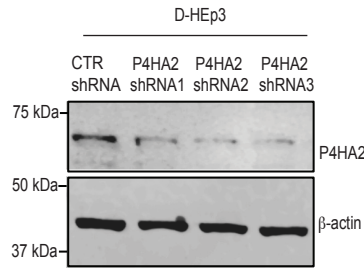

c)

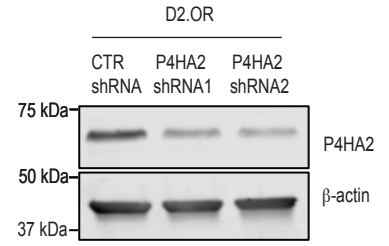

d)

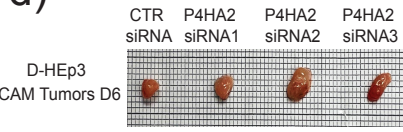

e)

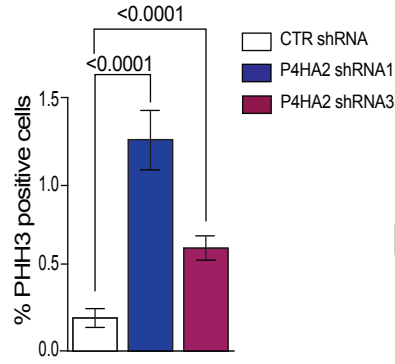

h)

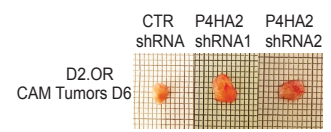

f)

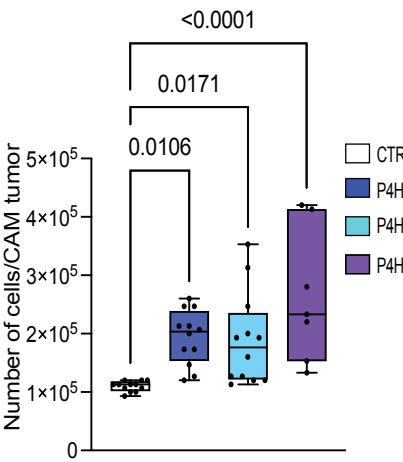

f)

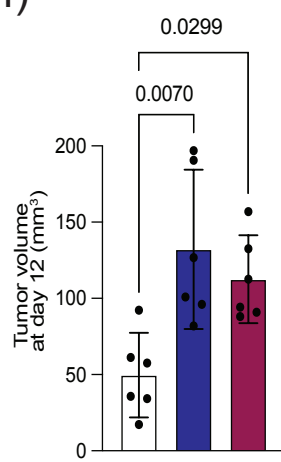

g)

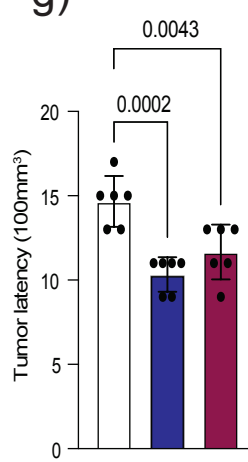

g)

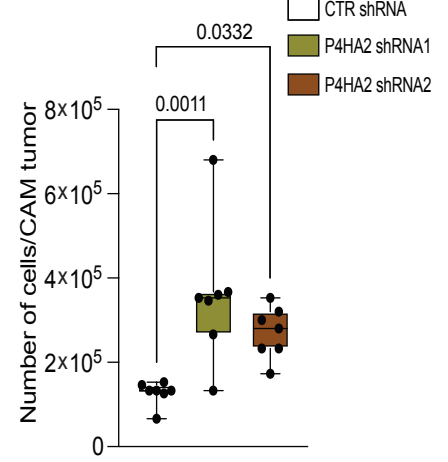

i)

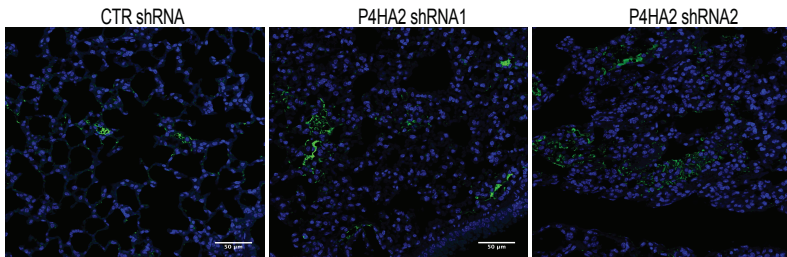

k)

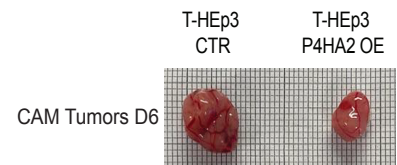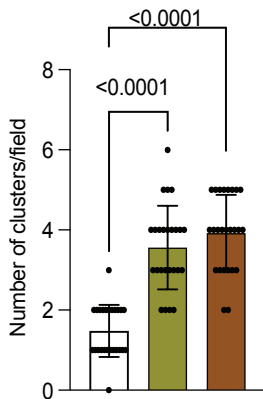

j)

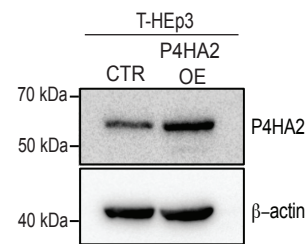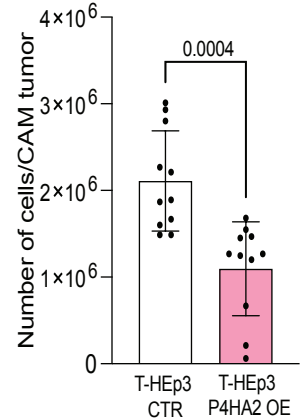

Supplement: Supplementary file 5 [file f79b35246e29430fdaf03bc8.pdf]

a)

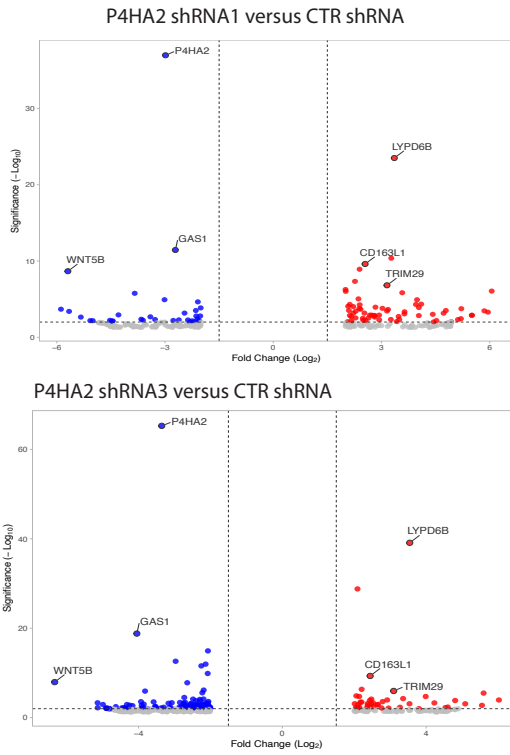

b)

# Supplemental Figure 3

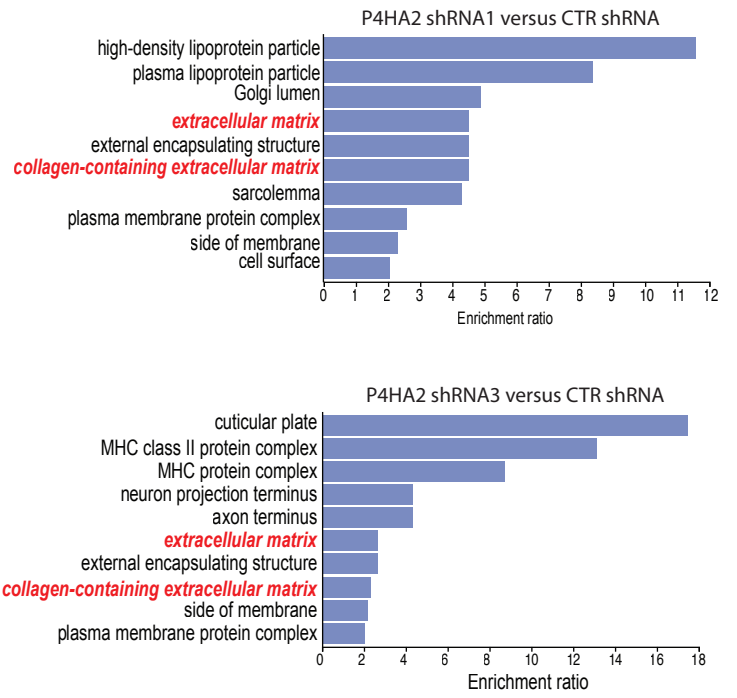

c)

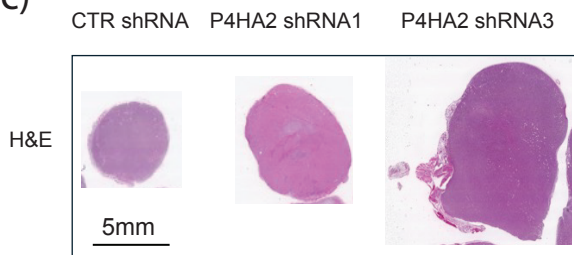

d)

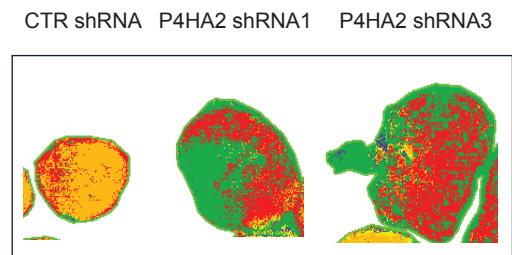

Spectra: 74873, Distance: 8833.22

38225

36648

Spectra: 57800, Distance: 14580.8

35831

Spectra: 21969, Distance: 10589.7

12473

9496

e)

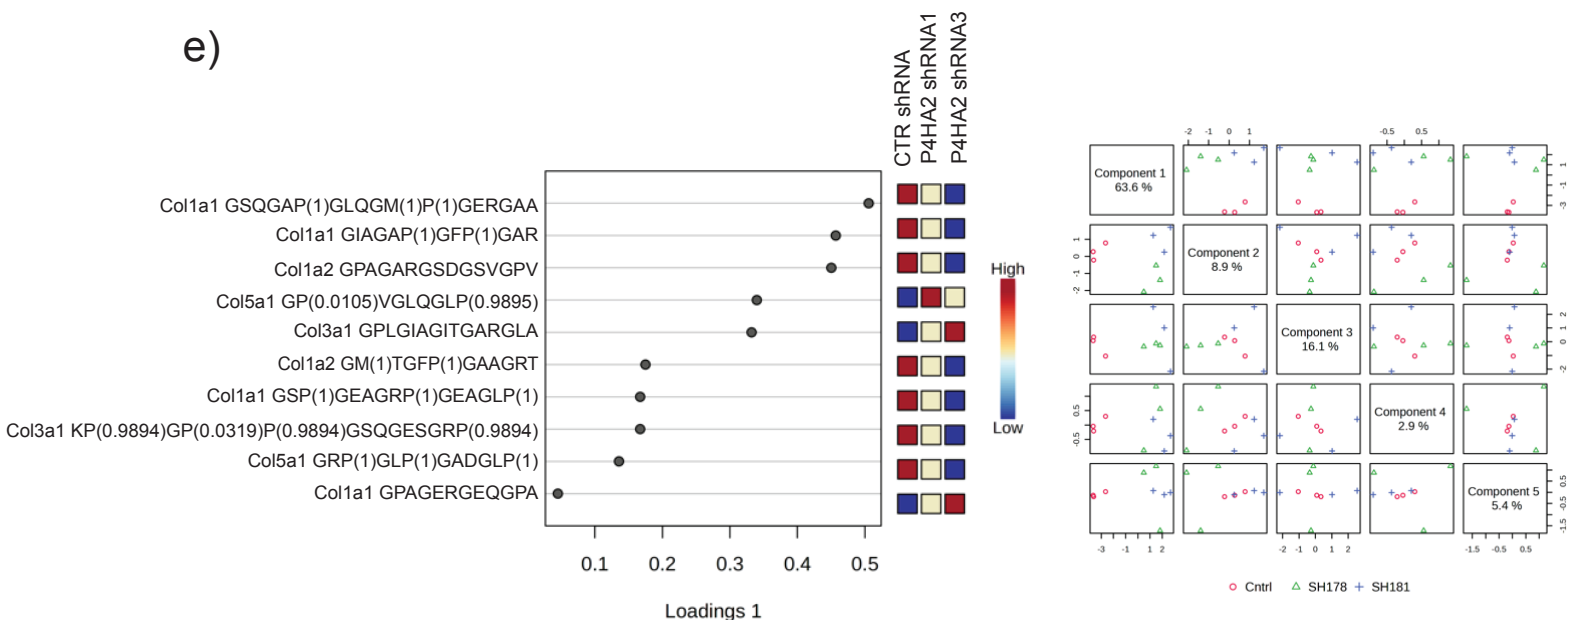

Supplement: Supplementary file 6 [file fcca611dd711e8d7ce6c36e3.pdf]
